# Supplementary material for: Rehabilitation in Survivors of COVID-19 (RE2SCUE): a nonrandomized, controlled, and open protocol
Source: medRxiv preprint, doi:10.1101/2021.09.06.21262986, version 1 (2021-09-13)
Supplement: Table 1 [file 262986_file05.docx]

| **Inclusion criteria** |
| --- |
| - Patients >18 years old of both sexes diagnosed with COVID-19 in the past 6 months. - Patients diagnosed with COVID-19 by RT-PCR and/or clinical−epidemiological means. - Patients having the presence of at least one of the following symptoms: fatigue, dyspnea, muscle pain, joint pain, and cough. - Patients with CVD receiving regular medical follow-ups. |
| **Exclusion criteria** |
| - Patients with respiratory diseases before COVID-19, such as asthma, COPD, or pulmonary fibrosis. - Patients with moderate-to-severe heart disease (NYHA III or IV). - Patients with neurological or osteoarticular diseases that prevent study participation. - Patients who have difficulty understanding the tests performed in the study. - Patients with cardiovascular symptoms or changes in their electrocardiogram that contraindicates physical exercise (as reported by a cardiologist). |
